# Supplementary material for: Validation and refinement of gene-regulatory pathways on a network of physical interactions
Source: PubMed Central journal article supplement (PMC1175993; doi:10.1186/gb-2005-6-7-r62), 2005-07-01

**Table S1: Internal validation for 17 out of 24 restricted network models.**

| Model | # Genes | Validated literature pathway                                | Refs.                | Enriched MIPS Function                                                                       |
|-------|---------|-------------------------------------------------------------|----------------------|----------------------------------------------------------------------------------------------|
| 0     | 109     | Kss1/Fus3-Ste12<br>(mating response and filamentous growth) | Elion et al. 1993    | cell fate ( $1.48 \times 10^{-7}$ );<br>metabolism (0.0067)                                  |
| 1     | 69      | Sok2-Msn4<br>(PKA pathway)                                  | Smith et al. 1998    |                                                                                              |
| 2     | 44      | Tup1/Ssn6-Nrg1<br>(glucose metabolism)                      | Park et al. 1999     | transport ( $1.05 \times 10^{-5}$ );<br>metabolism ( $5.41 \times 10^{-4}$ )                 |
| 3     | 58      | Tup1/Ssn6- $\alpha$ 2/Mcm1<br>(mating response)             | Wahi et al. 1995     | cell fate ( $1.12 \times 10^{-5}$ )                                                          |
| 4     | 44      | Swi4-Ndd1-Ace2<br>(cell cycle)                              | Lew et al. 2001      |                                                                                              |
| 6     | 36      | Slt2-Rlm1/Swi4<br>(PKC pathway)                             | Jung et al. 1999     |                                                                                              |
| 7     | 13      | Cmd1-Cna1-Skn7<br>(calcium signaling)                       | Williams et al. 2001 |                                                                                              |
| 8     | 9       |                                                             |                      | cell defense ( $6.33 \times 10^{-6}$ )                                                       |
| 10    | 12      | Med2-Gal11-Gal4<br>(general transcription)                  | Park et al. 2000     |                                                                                              |
| 12    | 7       |                                                             |                      | metabolism (0.026)                                                                           |
| 13    | 17      |                                                             |                      | metabolism ( $1.49 \times 10^{-5}$ )                                                         |
| 14    | 6       | Gcn4-Met4<br>(methionine synthesis)                         |                      | metabolism ( $2.88 \times 10^{-4}$ )                                                         |
| 16    | 9       | Ste12-Mcm1<br>(mating response)                             |                      | cell fate ( $4.55 \times 10^{-8}$ );<br>homeostasis (0.0012);<br>cell communication (0.0345) |
| 17    | 13      | Cka2-Abf1<br>(casein kinase pathway)                        |                      |                                                                                              |
| 20    | 5       |                                                             |                      | metabolism (0.0017)                                                                          |
| 22    | 8       | Cka2-Abf1<br>(casein kinase pathway)                        |                      |                                                                                              |
| 25    | 7       | Cka2-Abf1<br>(casein kinase pathway)                        |                      |                                                                                              |

Table S2: Correlations between *swi4Δ* and *gcn4Δ* data from Rosetta and the new experiments.

|                                 | <b><i>swi4Δ</i> total</b>  | <b><i>gcn4Δ</i> total</b>  |
|---------------------------------|----------------------------|----------------------------|
| <b>correlation</b>              | -0.013                     | 0.34                       |
| <b>correlation p-value</b>      | 0.84                       | < 10 <sup>-4</sup>         |
| <b>rank correlation</b>         | -0.058                     | 0.145                      |
| <b>rank correlation p-value</b> | 1.0                        | < 10 <sup>-4</sup>         |
| <b>hyper-geometric p-value</b>  | 0.188                      | 4.88×10 <sup>-21</sup>     |
|                                 | <b><i>swi4Δ</i> subset</b> | <b><i>gcn4Δ</i> subset</b> |
| <b>correlation</b>              | 0.344                      | 0.831                      |
| <b>correlation p-value</b>      | 8×10 <sup>-5</sup>         | < 10 <sup>-5</sup>         |
| <b>rank correlation</b>         | 0.353                      | 0.705                      |
| <b>rank correlation p-value</b> | 9×10 <sup>-5</sup>         | < 10 <sup>-5</sup>         |
| <b>hyper-geometric p-value</b>  | 1.05×10 <sup>-5</sup>      | < 1.8×10 <sup>-13</sup>    |

**Table S3: Restricted subsets used to evaluate the reproducibility.**

**Swi4 subset**

|       |        |         |         |
|-------|--------|---------|---------|
| AAP1  | LYS20  | YAP6    | YJL225C |
| ATR1  | MNN1   | YBL029W | YJR078W |
| BAT2  | MSN4   | YBL112C | YKL051W |
| CCP1  | NCE102 | YBL113C | YLR084C |
| CLB1  | PCL7   | YDR451C | YLR463C |
| CLB2  | PDR12  | YDR545W | YLR465C |
| CLB6  | PRY2   | YEL045C | YLR466W |
| COX9  | QCR2   | YEL047C | YLR467W |
| CPA2  | RNR1   | YEL077C | YML133C |
| CSI2  | RPI1   | YER045C | YNL339C |
| CUP9  | RPL19B | YER189W | YNR067C |
| ECM13 | SAT2   | YER190W | YOL011W |
| ECM33 | SCW10  | YFR006W | YOR248W |
| ERG6  | SGA1   | YGR086C | YOR315W |
| EXG1  | SNQ2   | YGR153W | YOX1    |
| HAP1  | SOK2   | YGR296W | YPL267W |
| HAP4  | SRL1   | YHL049C | YPL283C |
| HSC82 | SVS1   | YHR048W | YPR203W |
| HTA1  | SWI4   | YIL056W | YPS4    |
| HTB1  | TRP4   | YIL177C |         |
| ISU2  | UTR2   | YJL217W |         |

**Gcn4 subset**

|       |       |         |
|-------|-------|---------|
| ADH5  | HAD1  | UGA3    |
| APG1  | HAL2  | YER069W |
| ARG1  | HIS1  | YER073W |
| ARG11 | HIS4  | YGL184C |
| ARG3  | HOM3  | YHM1    |
| ARG7  | LEU4  | YHR122W |
| ARG8  | MET16 | YHR162W |
| ARO1  | PCL5  | YJL200C |
| ARO3  | RIB5  | YLR152C |
| CPA2  | TRP2  | YMC1    |
| GCN4  | TRP3  | YOL119C |

**Table S4: Gene sets for external validation.**

**Msn4 subset**

|         |         |
|---------|---------|
| ALD3    | LAP4    |
| ARA1    | PGM2    |
| CTT1    | RAS2    |
| YMR173W | SOD2    |
| DOT5    | SOL4    |
| GLK1    | SPS100  |
| GLO1    | SSA4    |
| GRE3    | TKL2    |
| GSY1    | TPS1    |
| HOR2    | TTR1    |
| HSP12   | YDL124W |
| HSP26   | YKR011C |
| HSP104  | YMR315W |
| HXK1    | YNL200C |

**Hap4 subset**

|       |         |
|-------|---------|
| ATP3  | COX13   |
| ATP7  | QCR7    |
| ATP16 | TUF1    |
| COX4  | QCR10   |
| COX7  | YLR294C |
| COX12 |         |

## Wiring diagrams for all inferred physical regulatory models

**Note: Model 0 contains interactions for which the annotations (activator/repressor) could be uniquely determined. Models 1-44 (38 total) contain ambiguous interactions. Hence, we show only one of many possible sets of annotations that are consistent with the original knockout data.**

Model 0

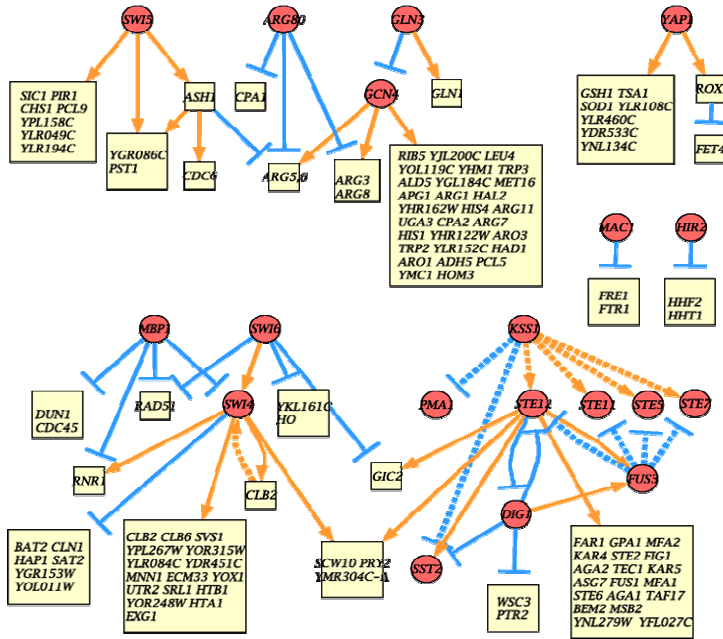

Model 1

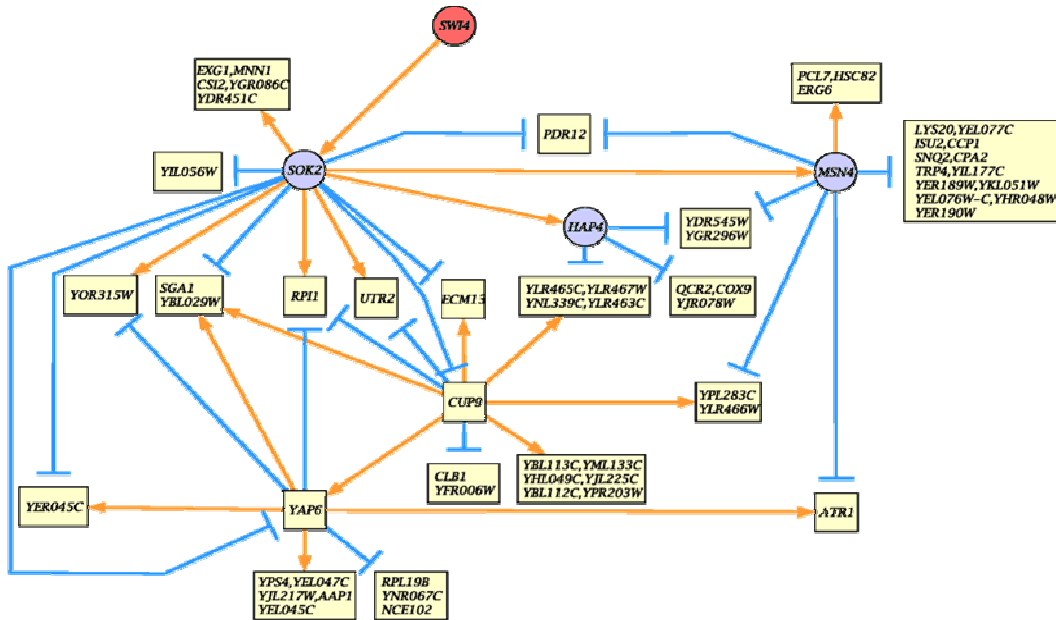

Model 2

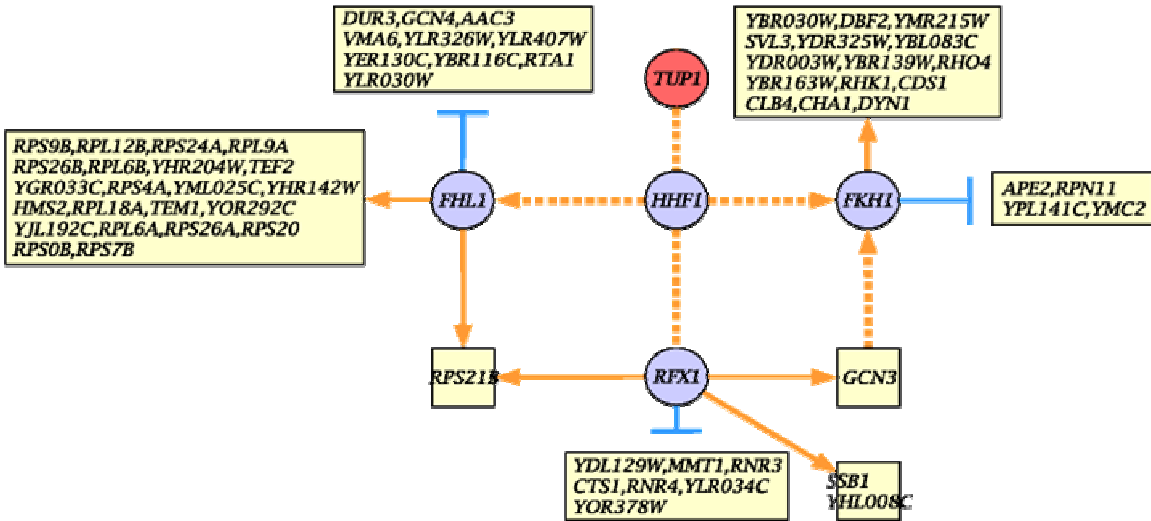

Model 3

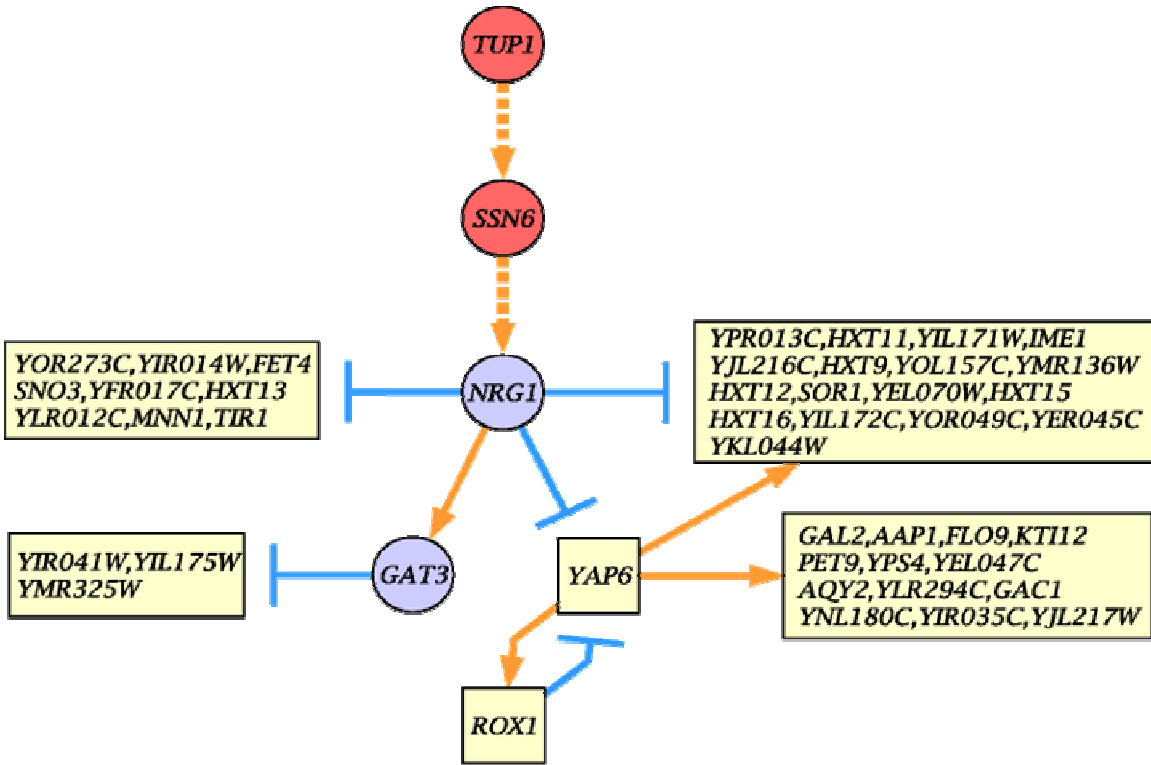

Model 4

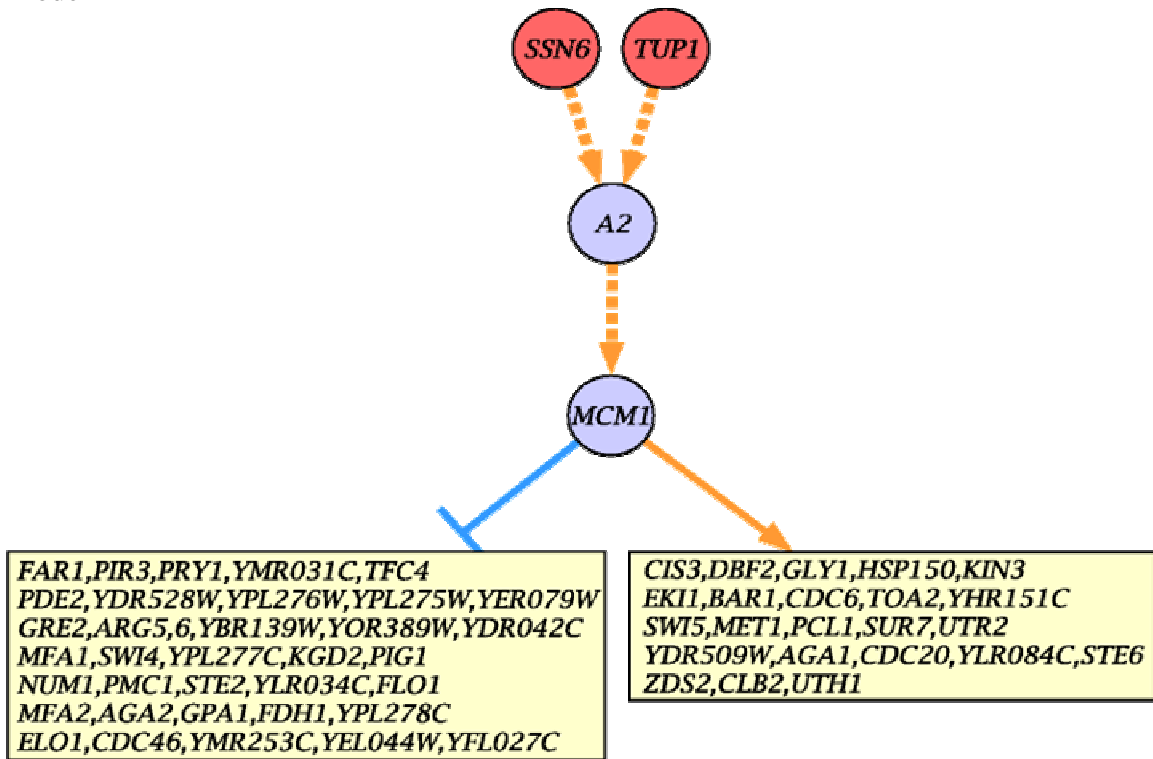

Model 5

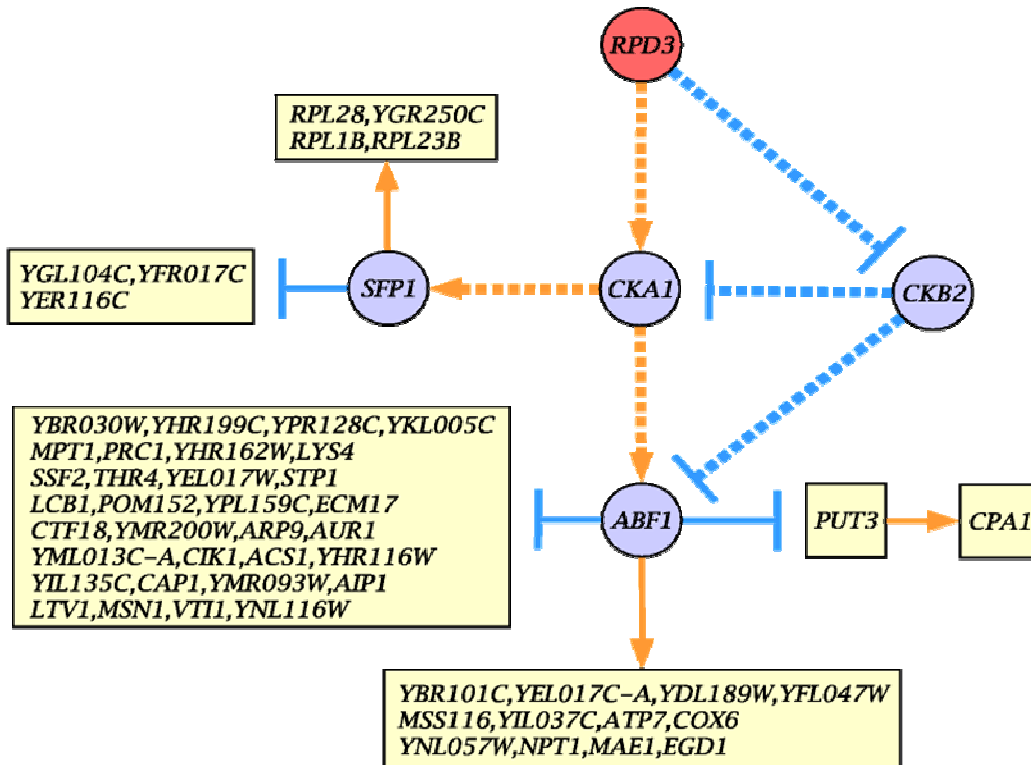

Model 6

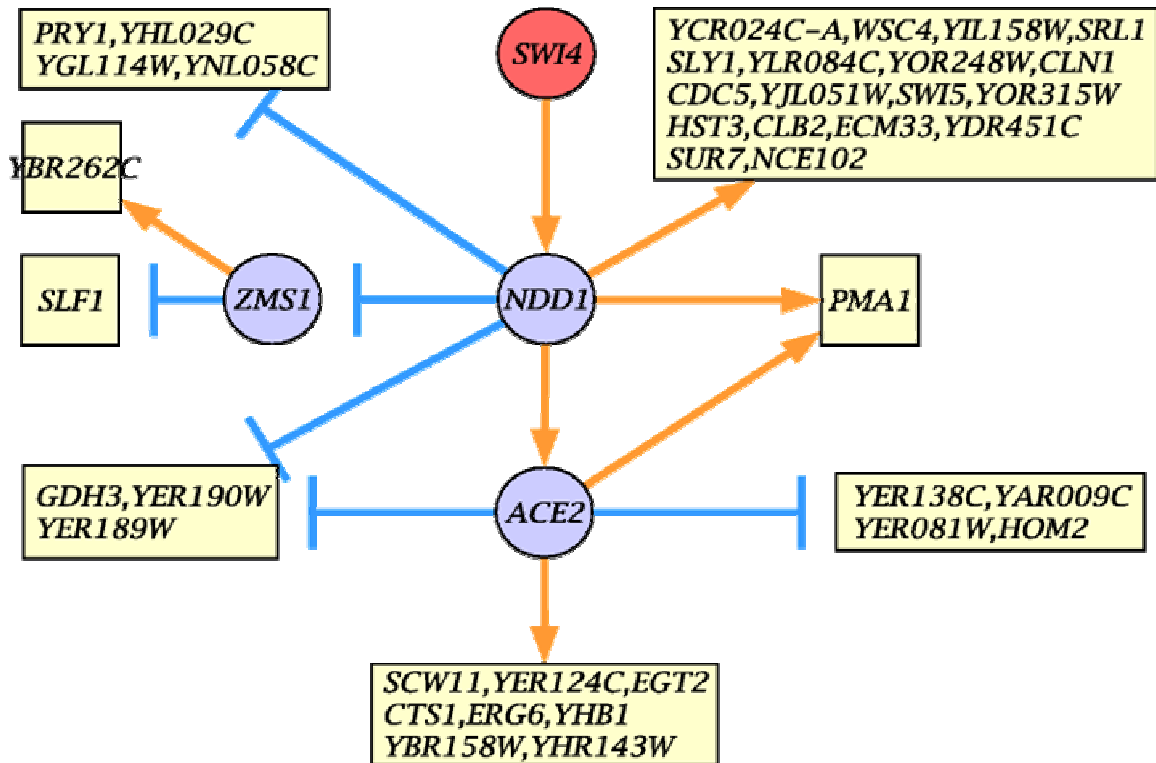

Model 7

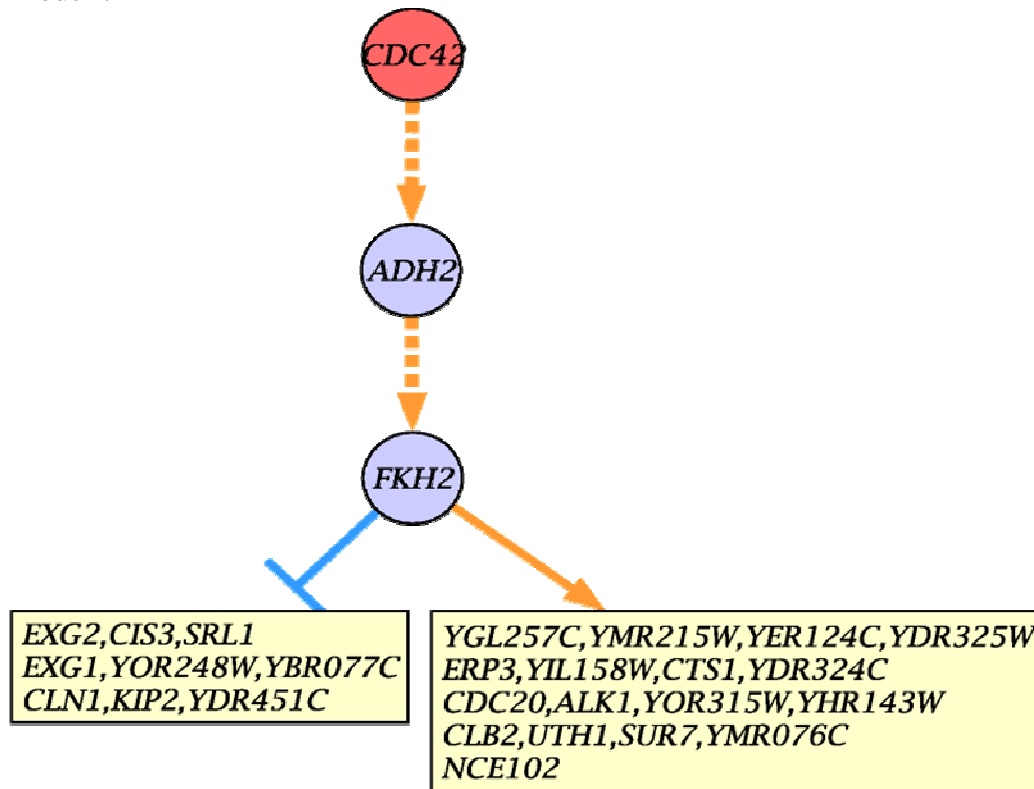



Model 8

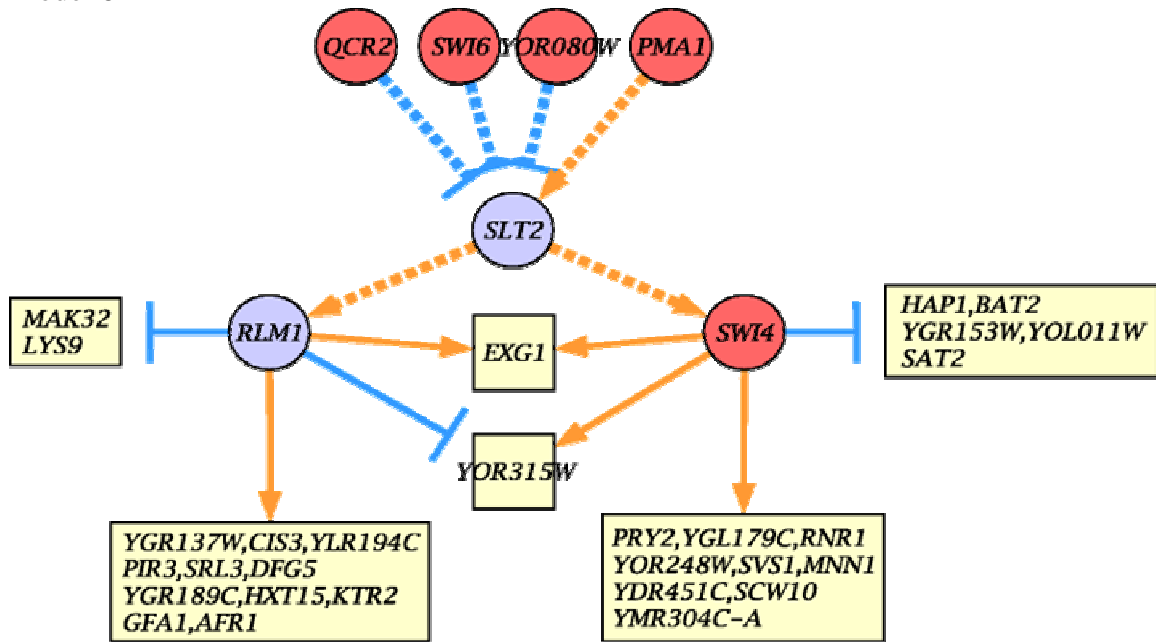

Model 10

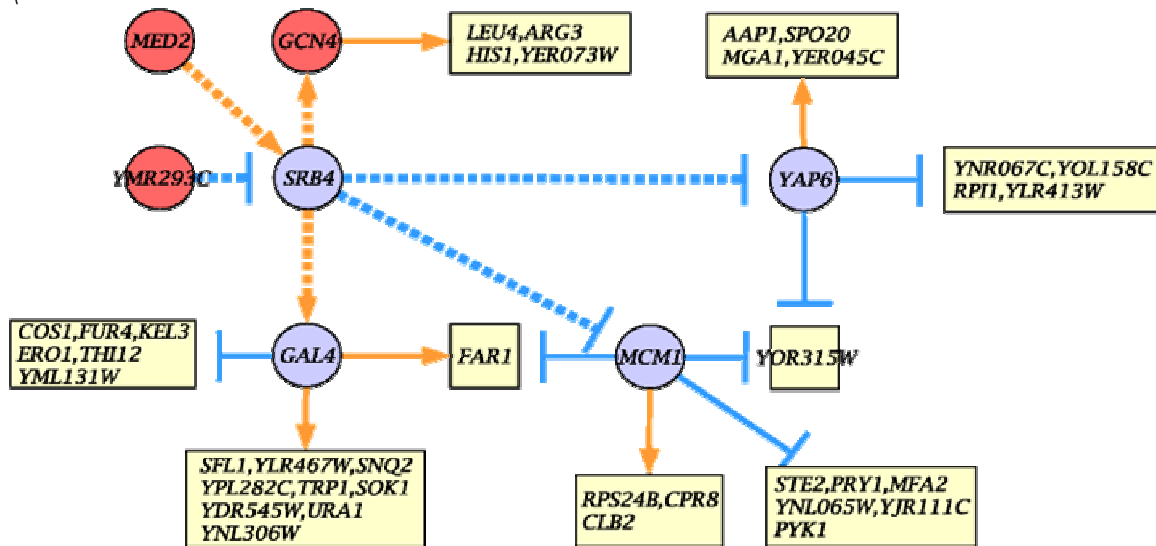

Model 11

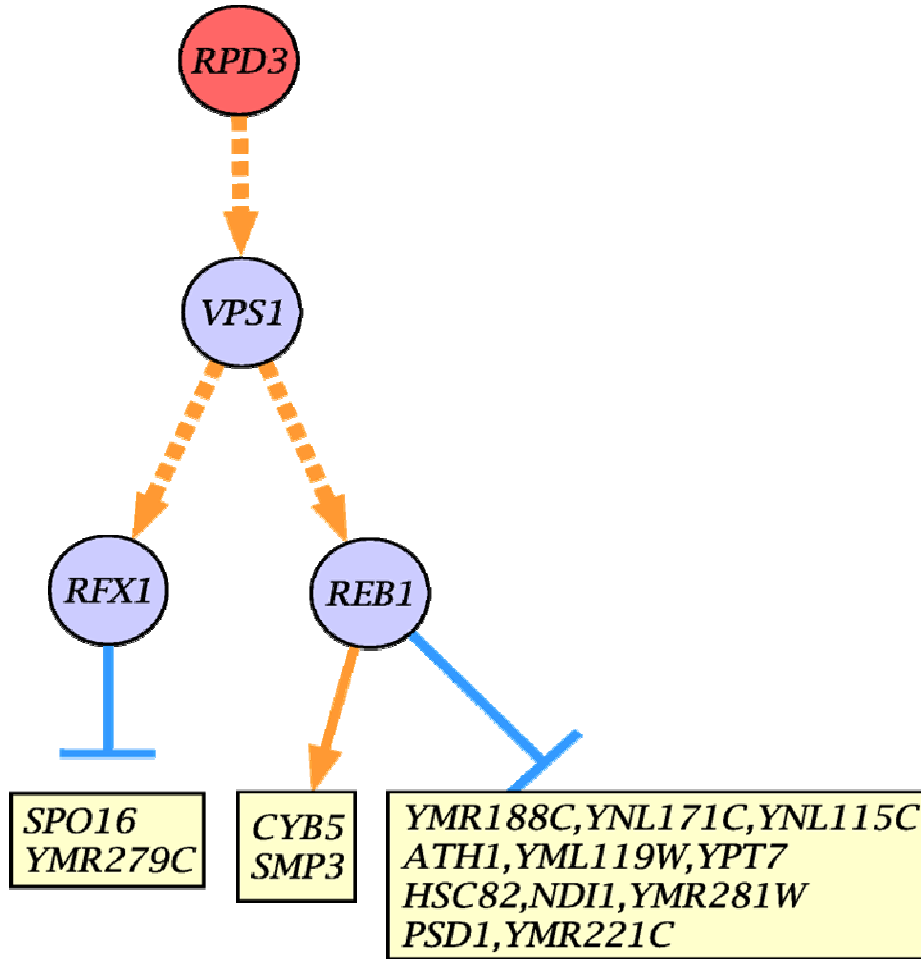

Model 13

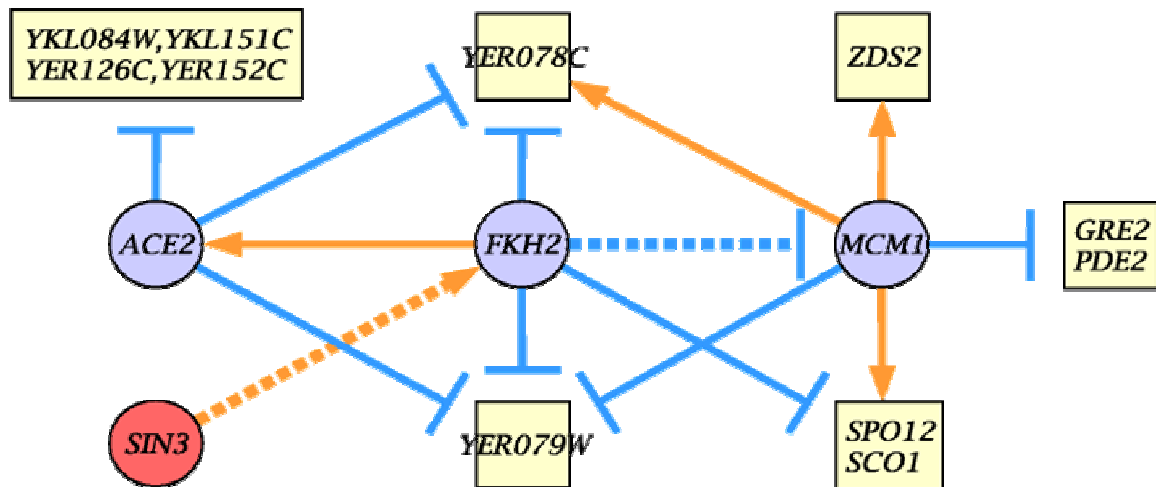

Model 14

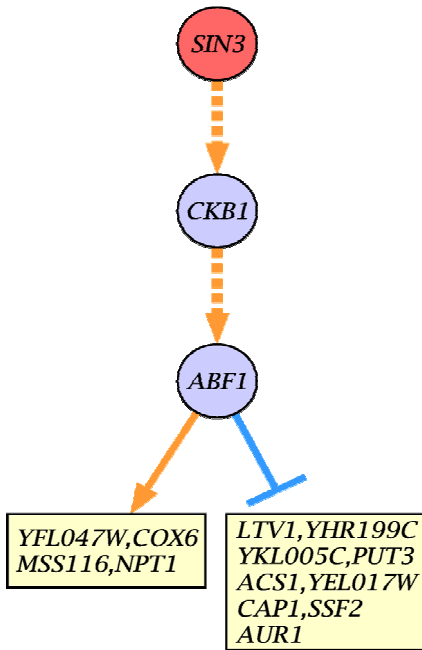

Model 15

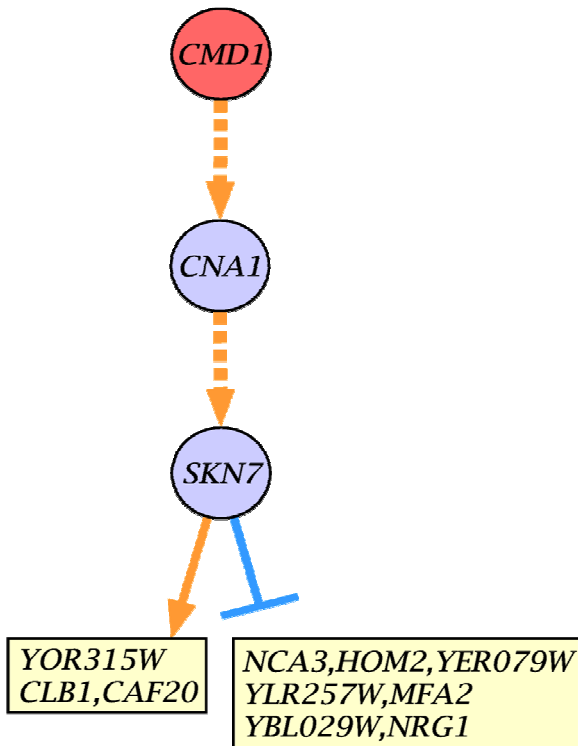

Model 16

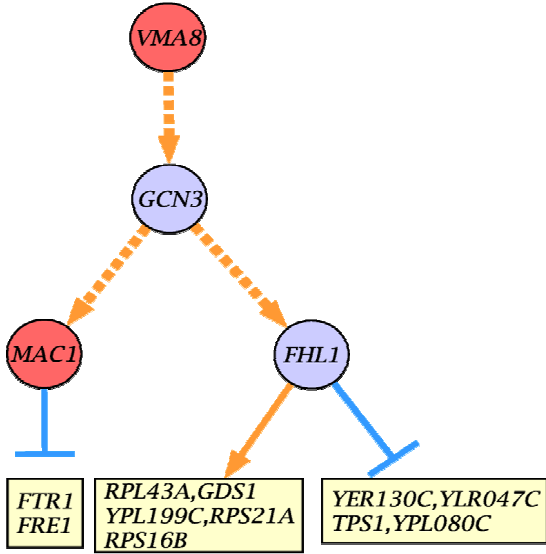

Model 19

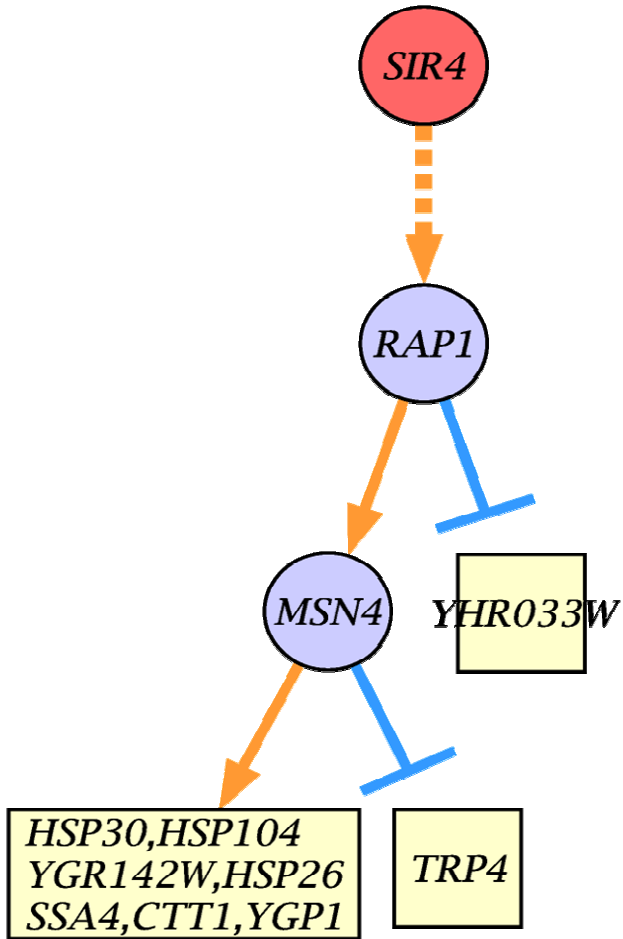

Model 20

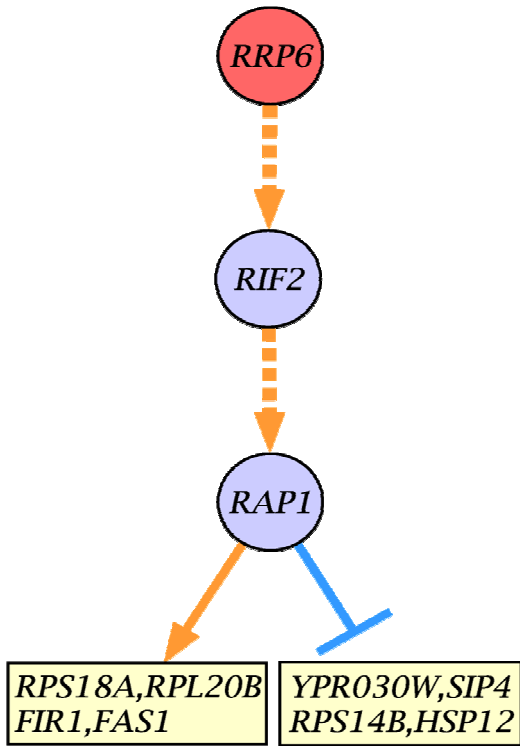

Model 21

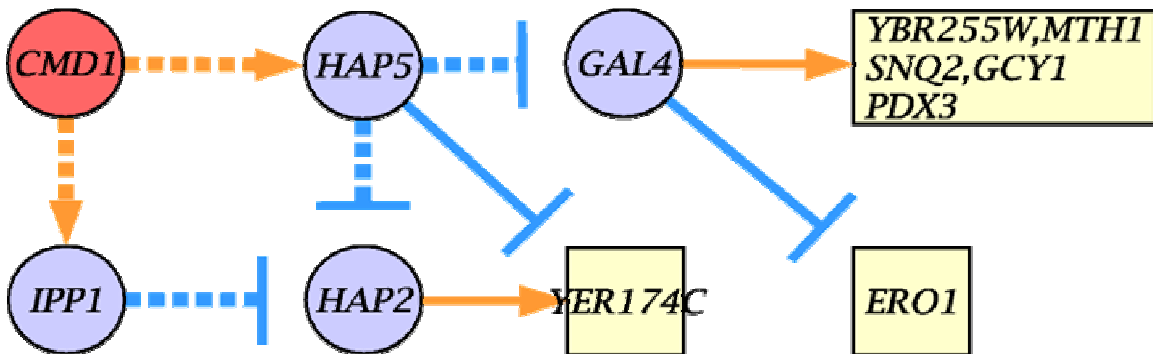

Model 22

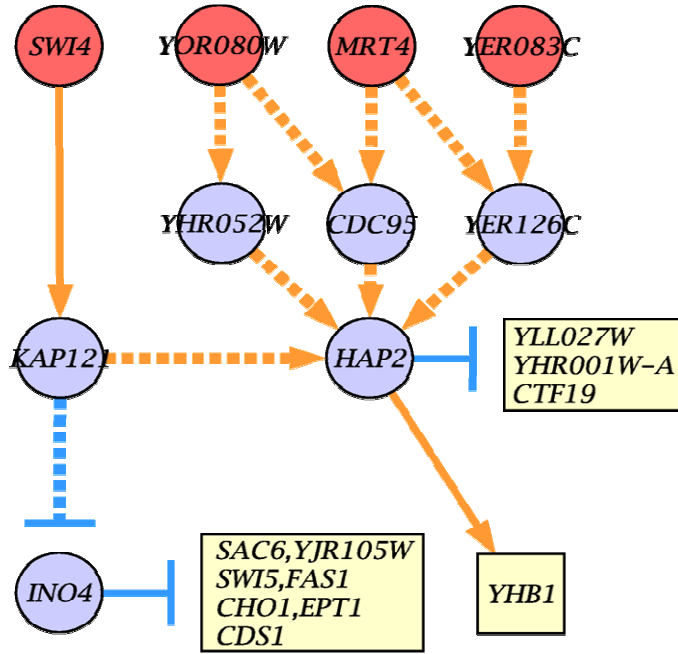

Model 23

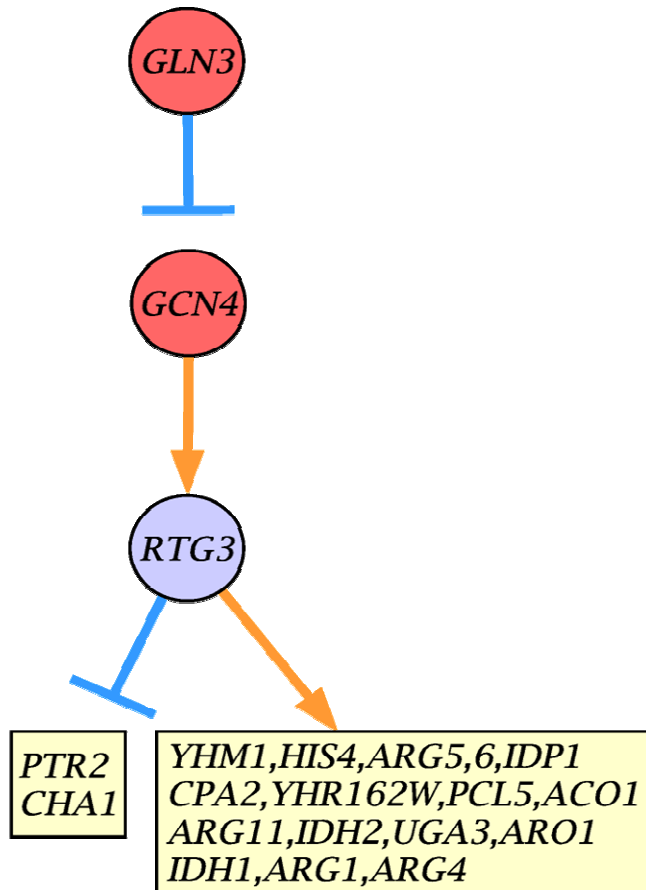

Model 24

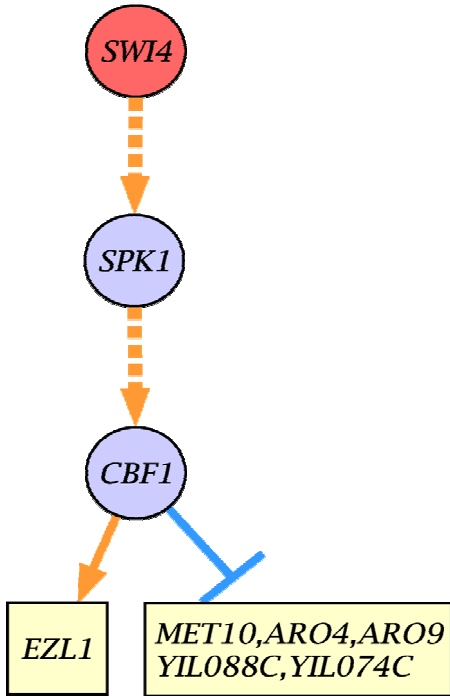

Model 25

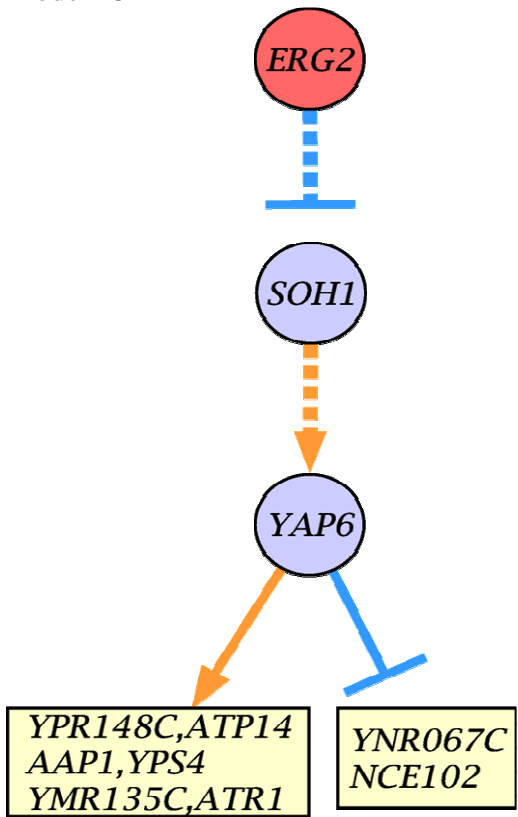

Model 26

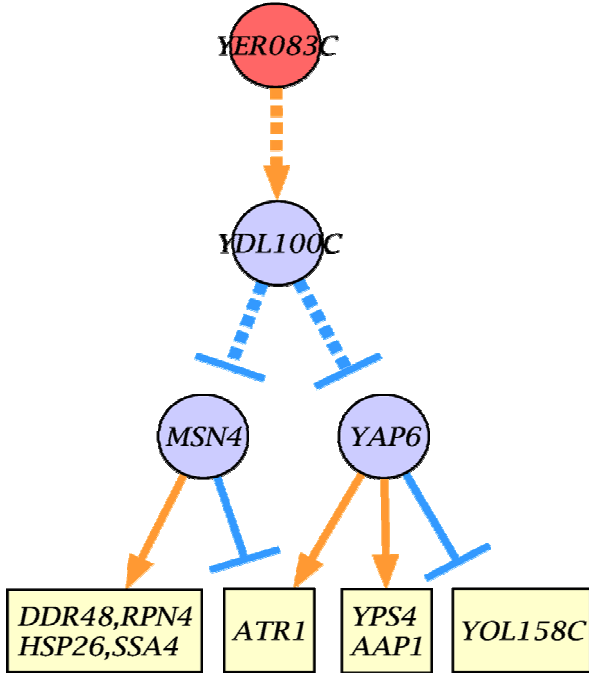

Model 27

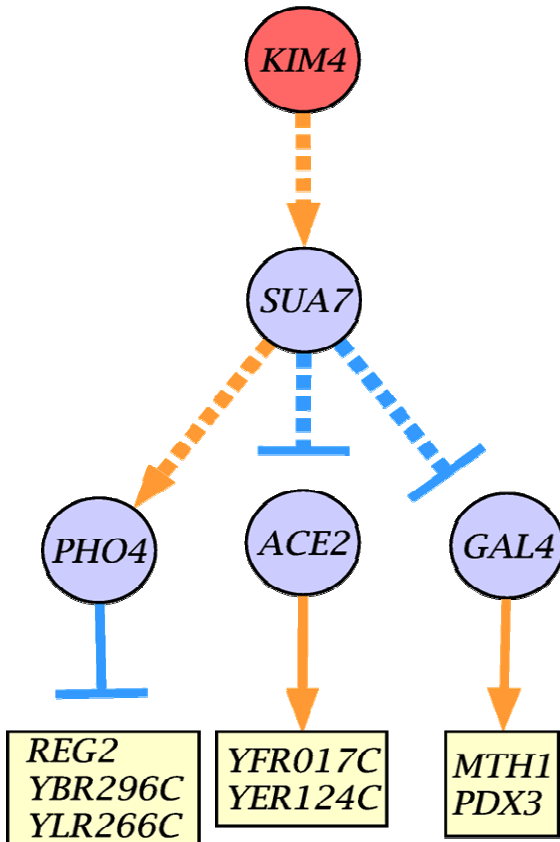



Model 28

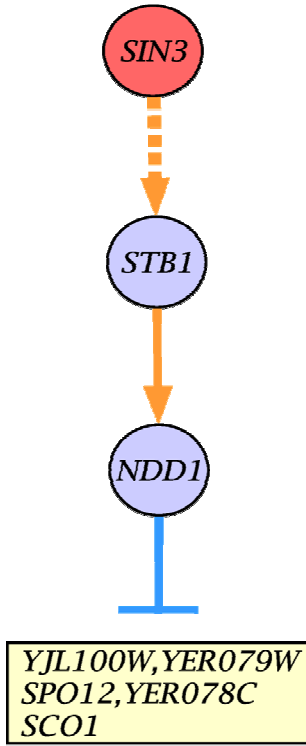

Model 29

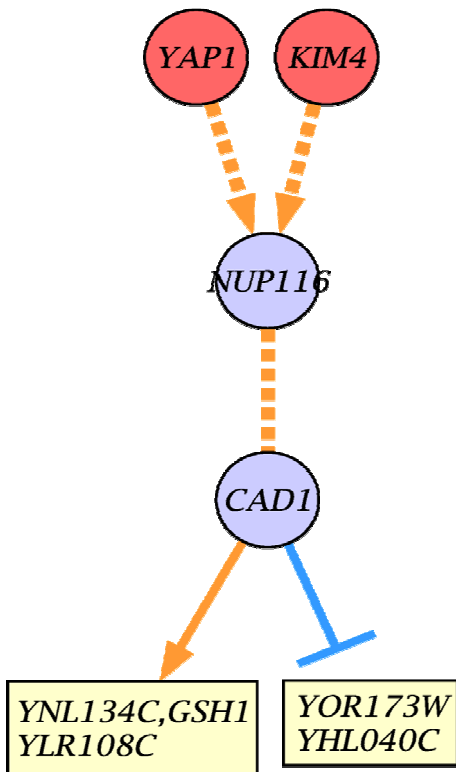

Model 30

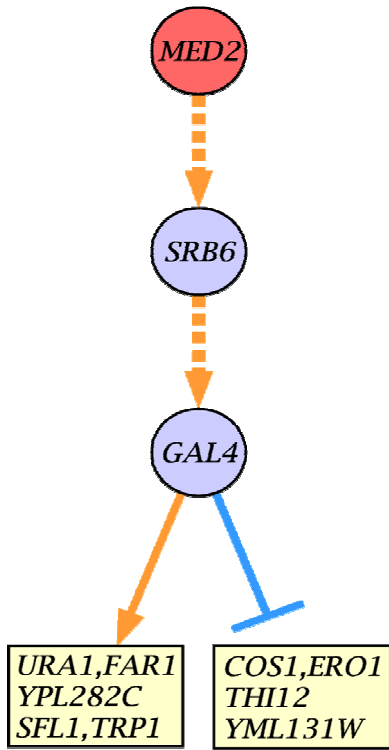

Model 31

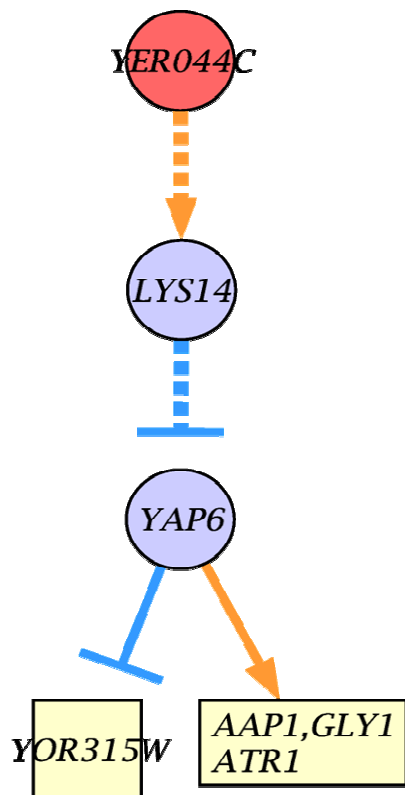

Model 32

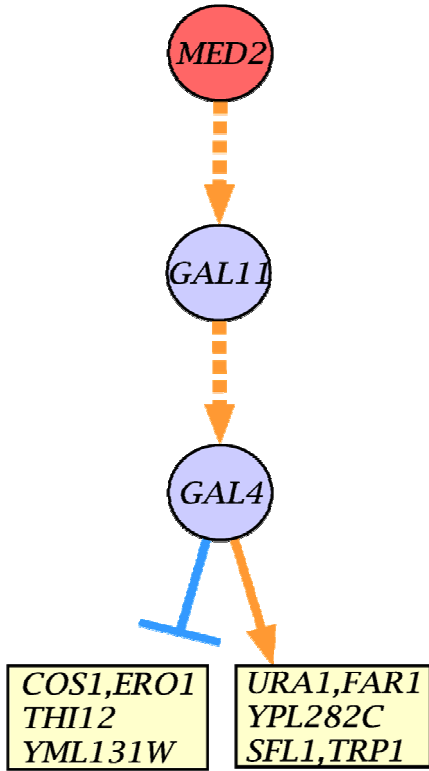

Model 33

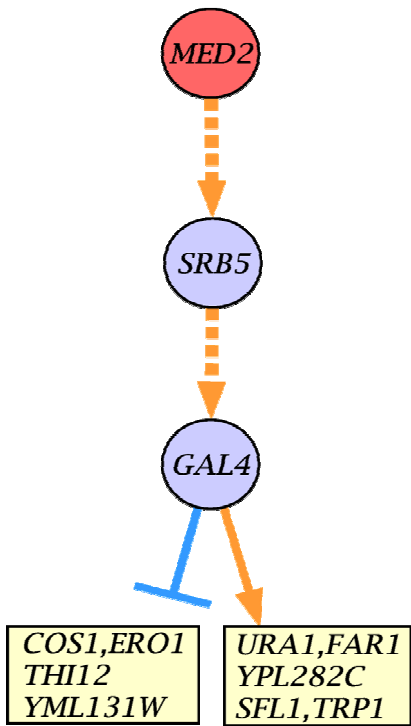

Model 34

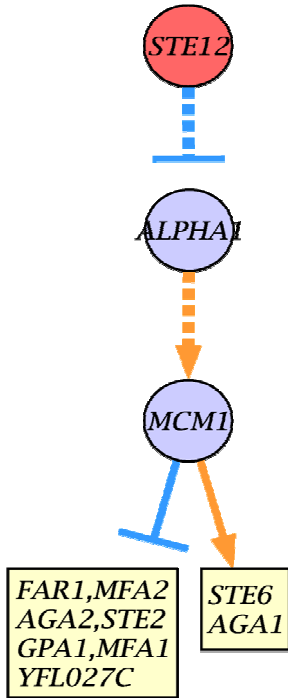

Model 35

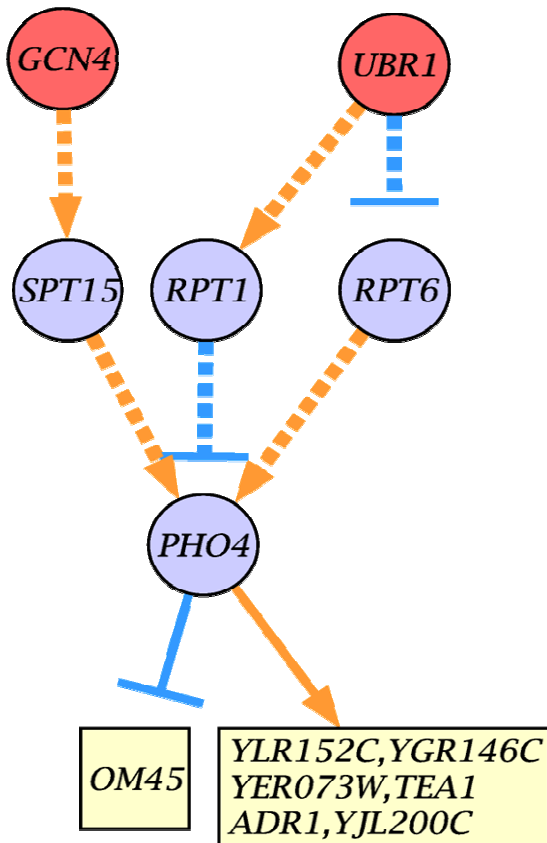

Model 36

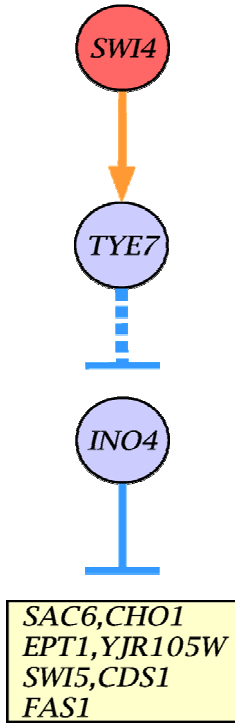

Model 39

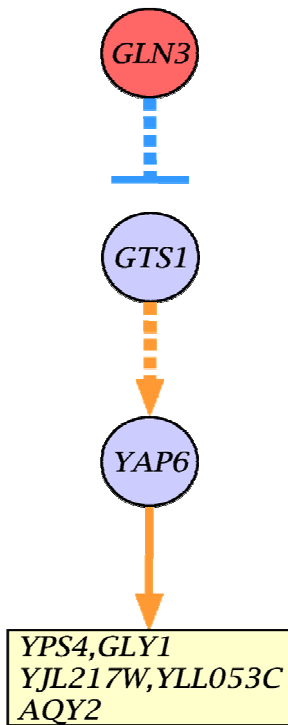

Model 40

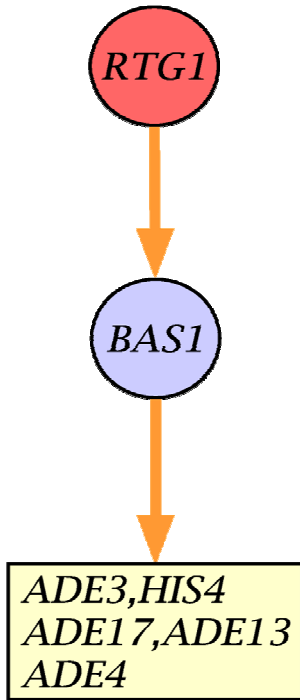

Model 41

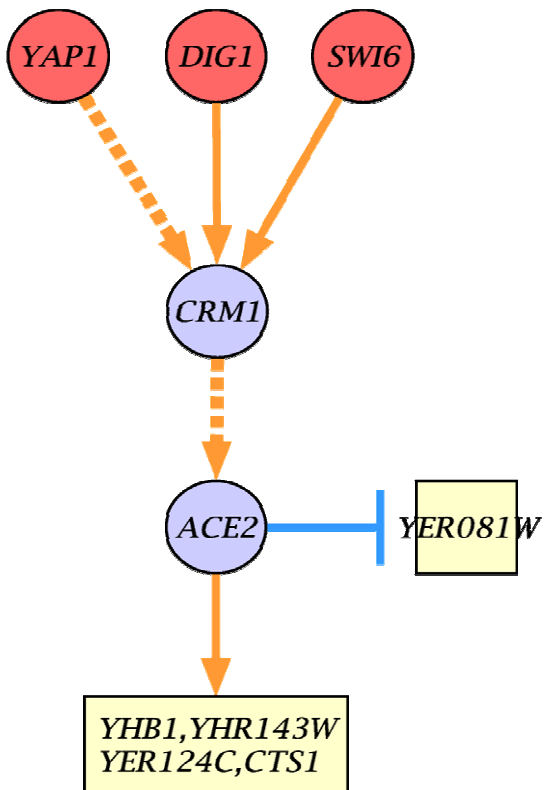

Model 42

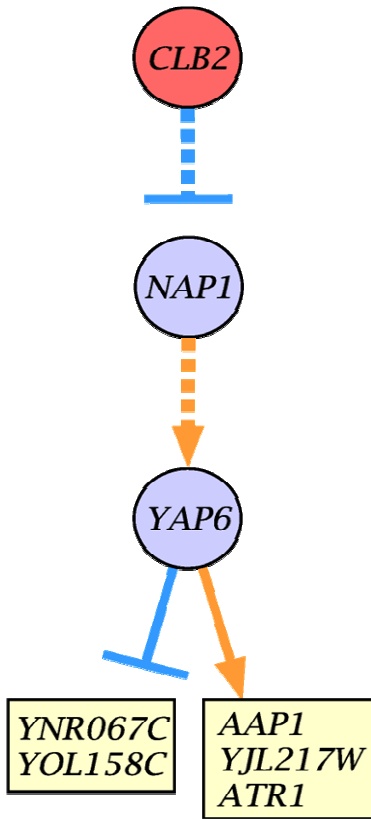

Model 44

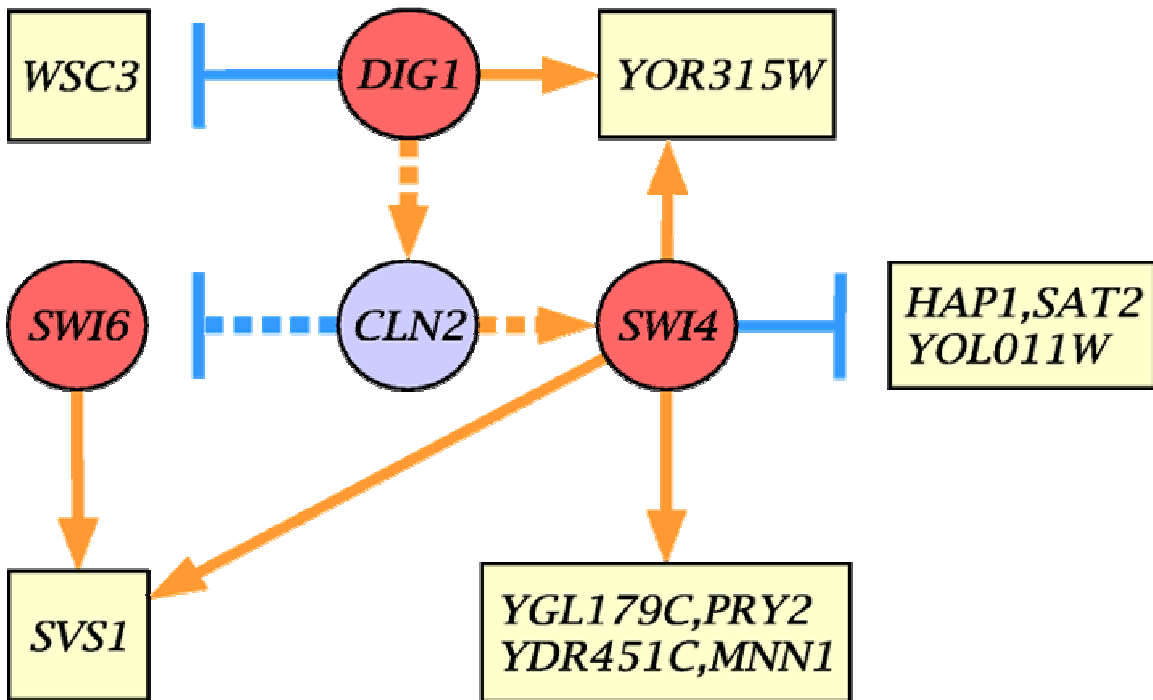

Supplement: gb-2005-6-7-r62-S1.pdf [file gb-2005-6-7-r62-S1.pdf]
